# Supplementary material
Source: Springer Nature journal article supplement (https://www.springermedizin.de/resource/supplementary/13019_2013_1560_MOESM3_ESM.pdf/9640652)

June 2

ISONO KATS

95.8% x 100.0 cm  
No cut

S-274

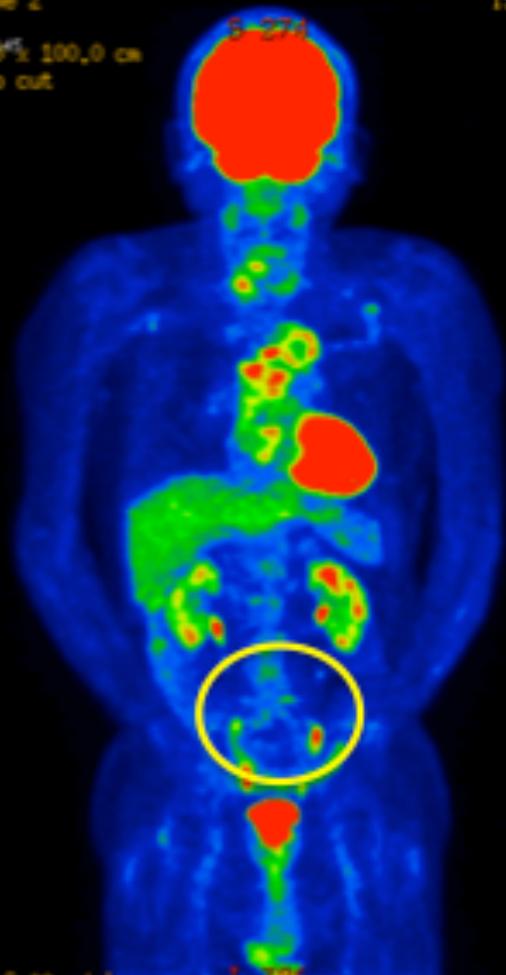

M=6.00 g/ml

I-125

V=1.

Supplement: MOESM3 [file 9640652]
